# Supplementary material for: Epigenetic signatures distinguish multiple classes of enhancers with distinct cellular functions
Source: HighWire-hosted journal article supplement (doi:10.1101/gr.122382.111), 2011-06-01
Supplement: Supp_Figure_617.pdf [file Supp_Figure_617.pdf]

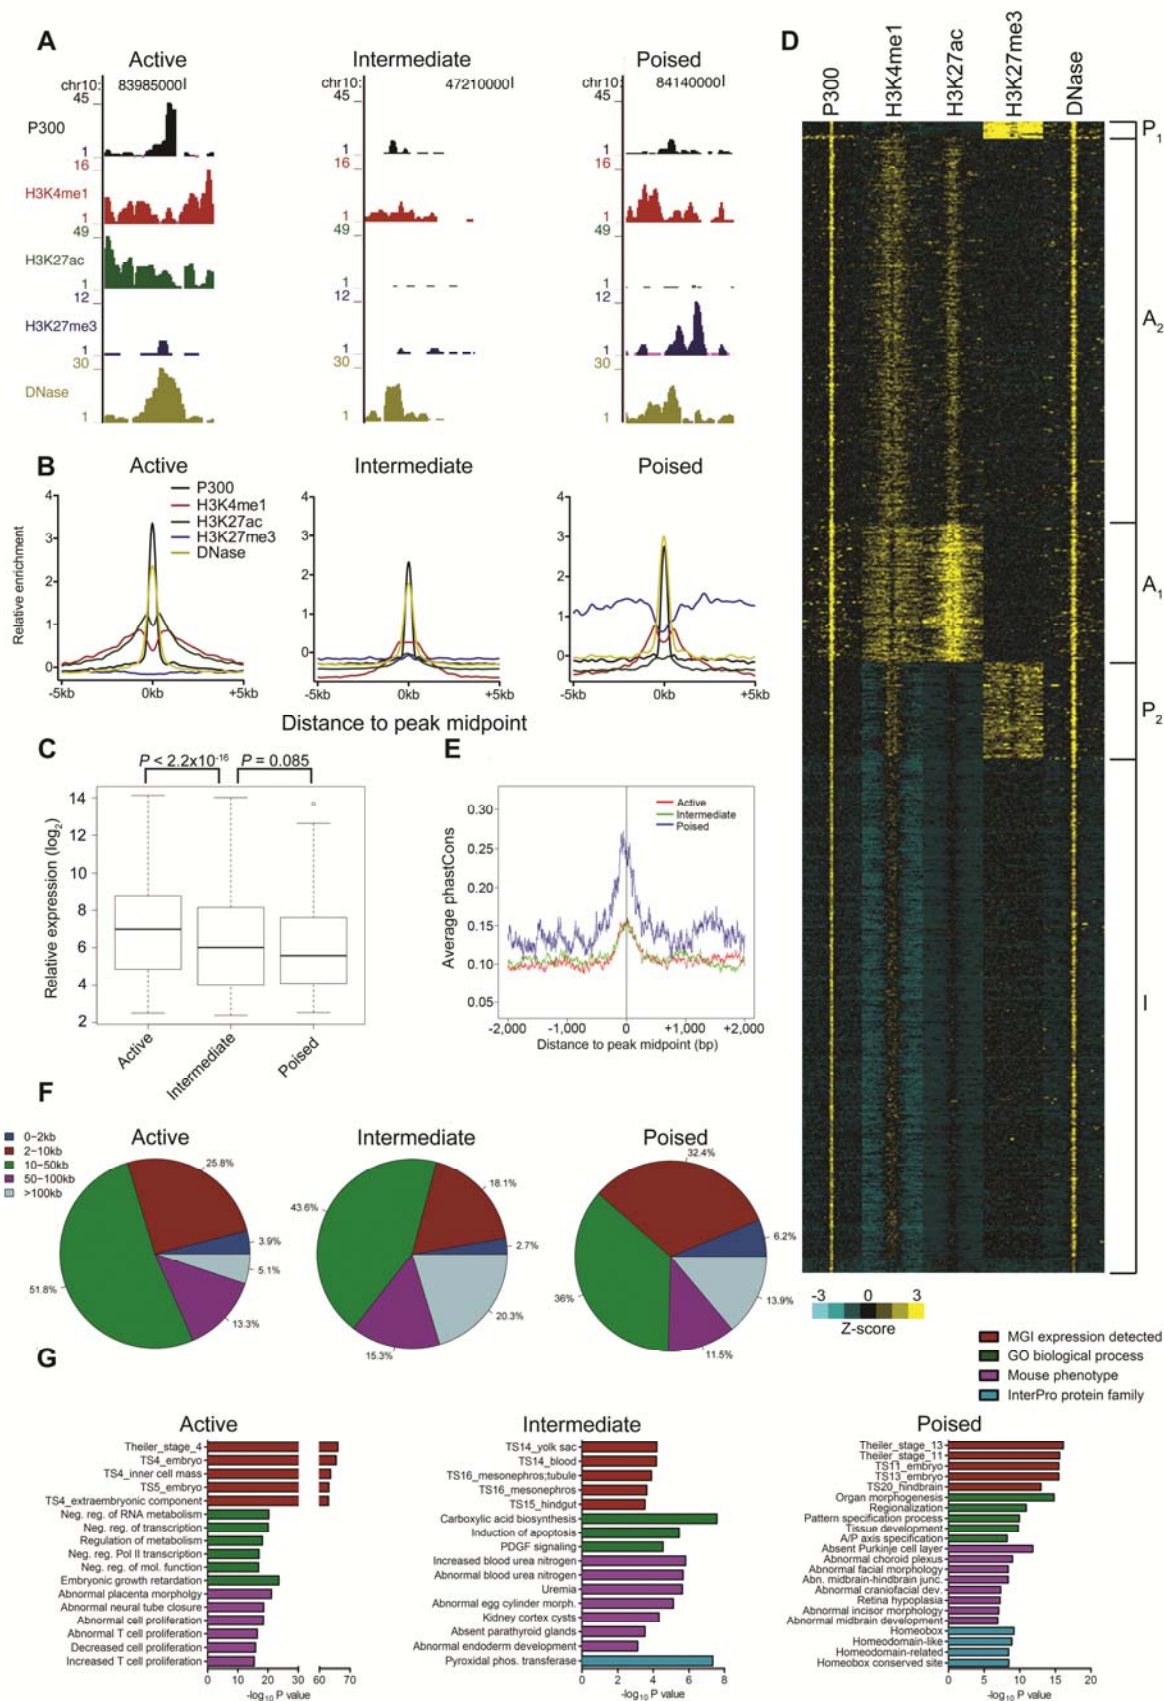

### **Supplementary Figure 1. Characteristics of p300-bound enhancers in mESCs**

(A) Example ChIP-seq profiles of each enhancer class in mESCs. Data were visualized using the UCSC genome browser. (B) Aggregate plots of CHD7, H3K4me1, H3K27ac, H3K27me3, and DNase hypersensitivity signal centered on the CHD7 peak midpoint. (C) Average expression of genes associated with each enhancer class. *P*-values were calculated by Wilcoxon rank-sum test. (D) Heatmap of CHD7-bound enhancers generated by k-means cluster analysis. Each window represents signal +/- 5 kb of the CHD7 peak midpoint. Active clusters are designated A1-2, the intermediate cluster is designated I, and the poised clusters are designated P1-2. (E) Average phastCons plot for each enhancer class in a 4 kb window centered on the CHD7 peak midpoint. (F) Distribution of enhancers in each class relative to known transcription start sites. (G) Results of functional annotation of each enhancer class using GREAT. The  $-\log_{10}$  of the binomial test *P*-value is reported.

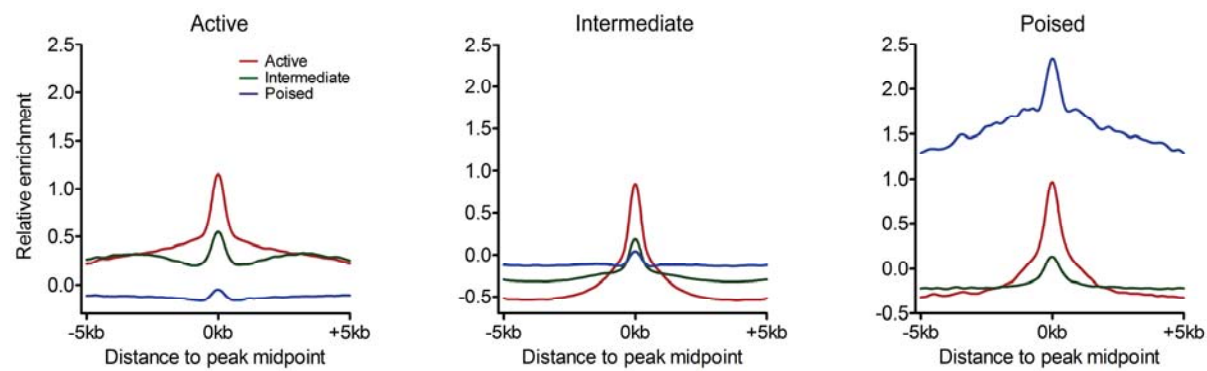

**Supplementary Figure 2. Chromatin characteristics of H3K4me1/H3K27ac-defined enhancers in mESCs**

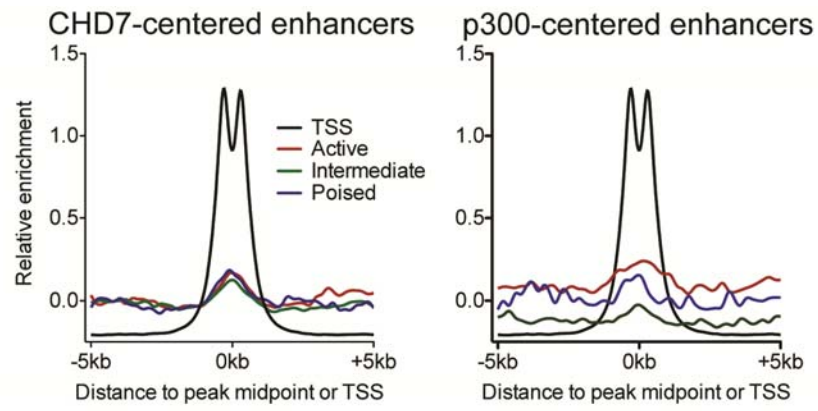

**Supplementary Figure 3. Profiles of H3K4me3 signal at enhancer classes in mESCs**

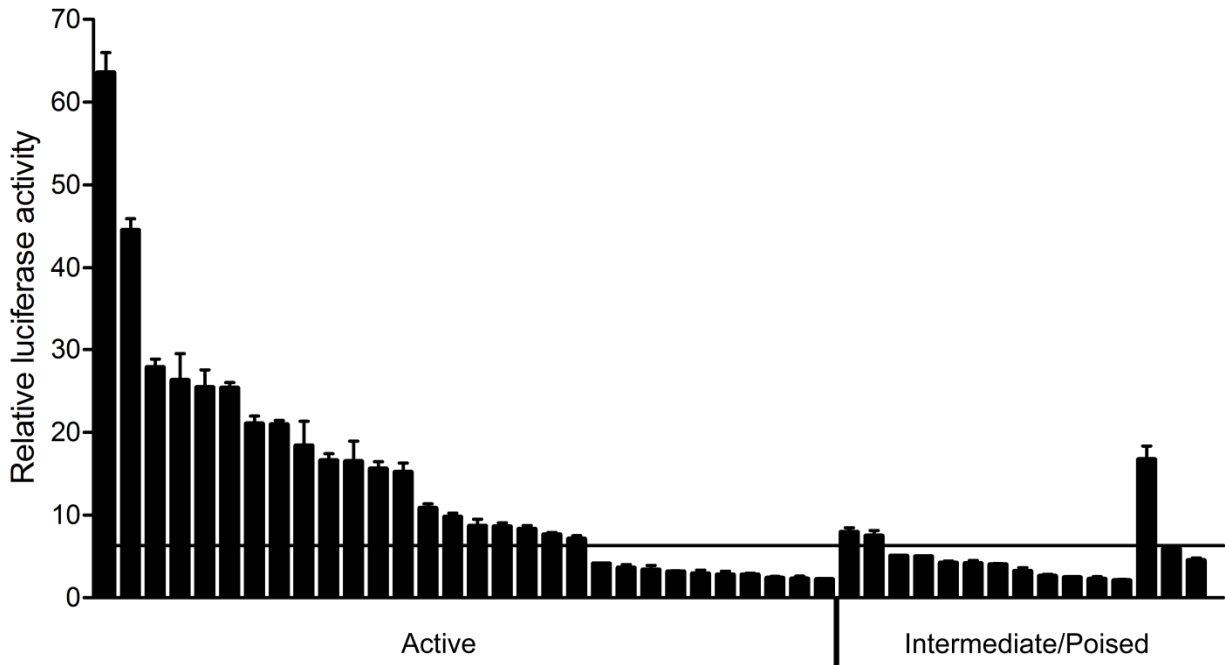

**Supplementary Figure 4. Activity of computationally identified enhancers in mESCs**

Luciferase assay data was previously published (Schnetz et al. 2010). The threshold is set at a three-fold increase over negative controls (relative luciferase = 6.3).

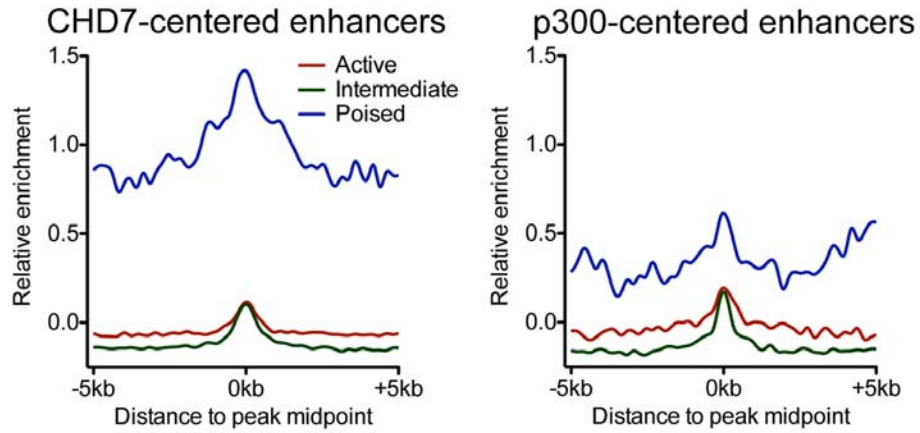

**Supplementary Figure 5. Profiles of Ezh2 enrichment at enhancer classes in mESCs**  
Similar results were obtained after analysis of Suz12 and Ring1b ChIP-seq data (data not shown).

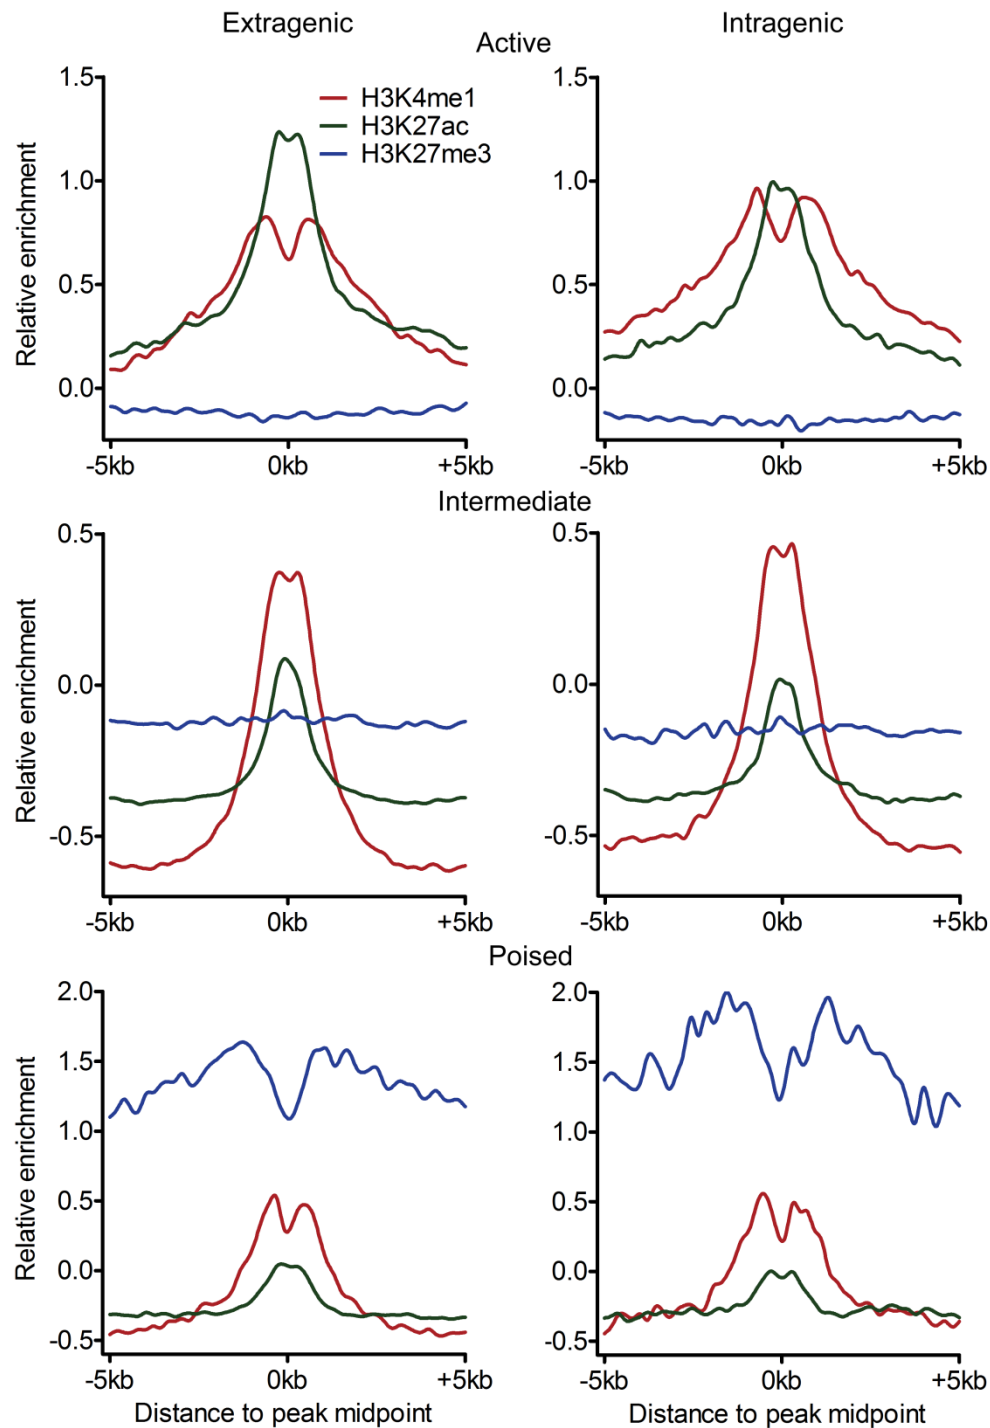

**Supplementary Figure 6. Profiles of H3K4me1, H3K27ac, and H3K27me3 at extragenic and intragenic CHD7-bound mESC enhancers**

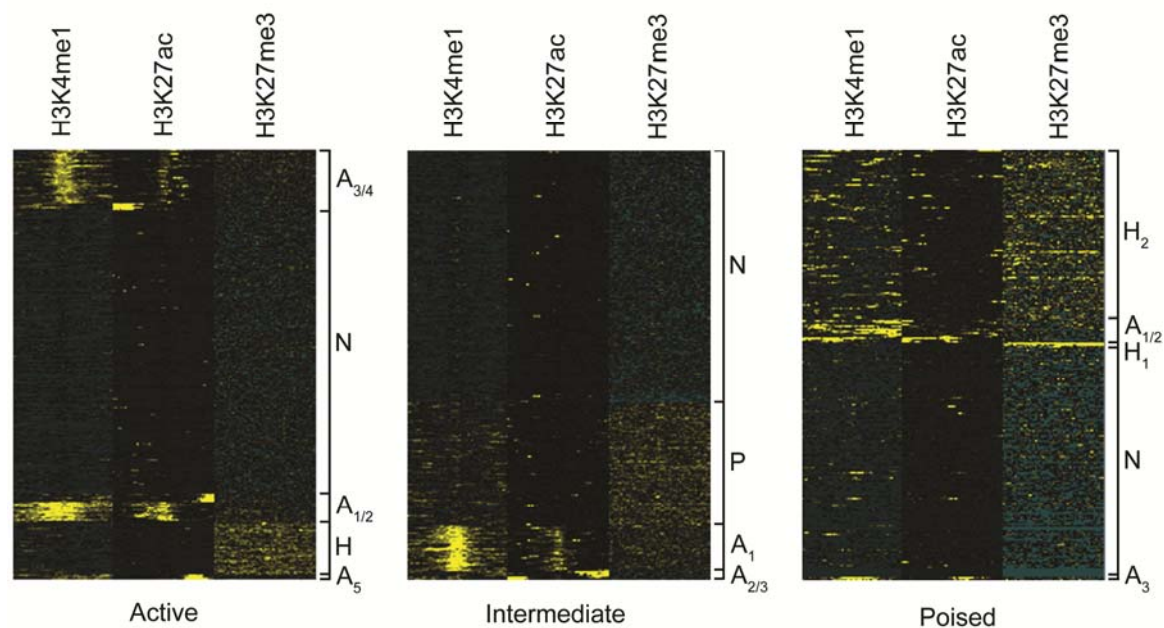

**Supplementary Figure 7. Heatmap representations of mNPC enhancer classes derived from p300-bound mESC classes**

Heatmaps are as described in Fig. 5A. The class of mESC enhancer from which each mNPC heatmap was generated is indicated below the heatmap. Note that, similar to CHD7-bound enhancers, both the active and poised classes give rise to active, neutral, and H3K27me3-only classes in mNPCs while intermediate enhancers give rise to active, neutral, and poised classes.



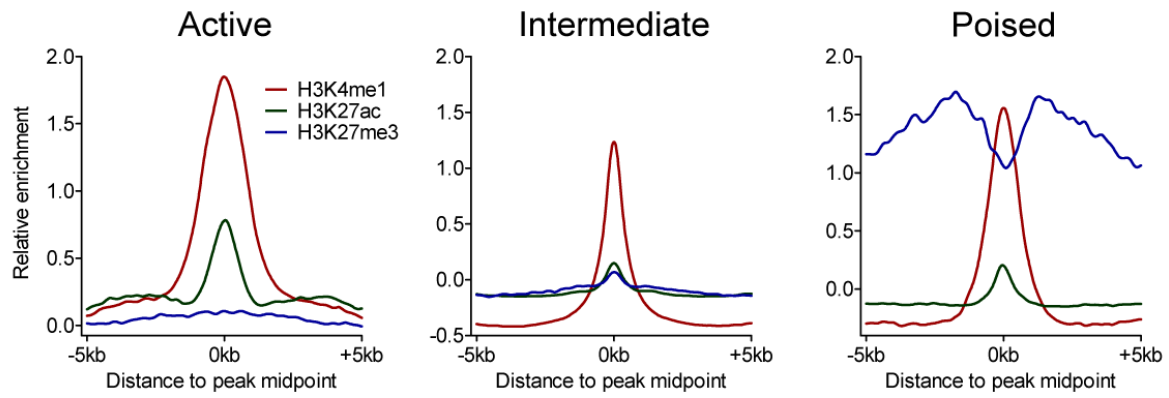

**Supplementary Figure 8. Chromatin characteristics of H3K4me1/H3K27ac-defined enhancers in mNPCs**

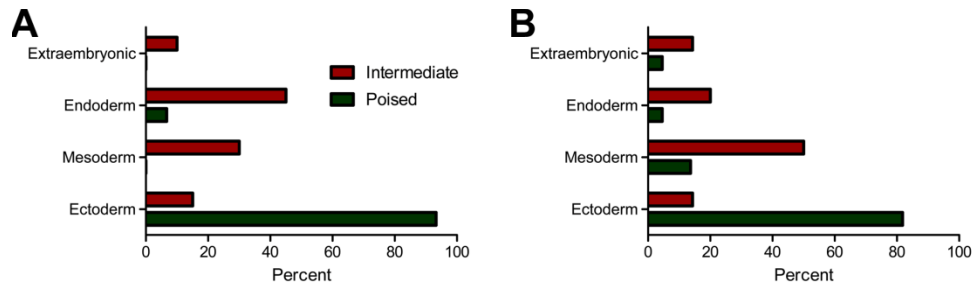

### Supplementary Figure 9. GREAT analysis of non-CHD7 or -p300 centered mESC enhancers

GREAT analysis was performed as in Fig. 6, but instead of centering enhancers on CHD7 or p300 peak midpoints, enhancers were centered on the midpoints of the combined H3K4me1/H3K27ac peaks list described in the Methods section. (A) Percentage of H3K4me1/H3K27ac-defined enhancer expression annotations associated with each germ layer in mESCs. (B) Percentage of H3K4me1/H3K27ac-defined enhancer mouse phenotype annotations associated with each germ layer in mESCs.
