# Supplementary material for: Epigenetic signatures distinguish multiple classes of enhancers with distinct cellular functions
Source: HighWire-hosted journal article supplement (doi:10.1101/gr.122382.111), 2011-06-01
Supplement: supplementary_data_legends.pdf [file supplementary_data_legends.pdf]

## **Supplementary data legends**

**Supplementary Data 1.** Coordinates of CHD7- and P300-bound enhancers in mESC. Coordinates represent a 1 kb window centered on the CHD7 or p300 peak midpoint.

**Supplementary Data 2.** Coordinates of H3K4me1/H3K27ac-defined enhancers in mESCs, mNPCs, adipocytes, and mBMDMs. Coordinates represent a 1 kb window centered on the H3K4me1/H3K27ac peak midpoint.

**Supplementary Data 3.** Complete list of GREAT results for CHD7- and P300-centered enhancer classes in mESCs.

**Supplementary Data 4.** Complete list of GREAT results for enhancer classes in adipocytes and mBMDMs.
